# Supplementary material for: Hyperactivated stallion spermatozoa fail to exhibit a rheotaxis-like behaviour, unlike other species
Source: Sci Rep. 2018 Nov 15;8:16897. doi: 10.1038/s41598-018-34973-9 (PMC6237856; doi:10.1038/s41598-018-34973-9)

**Hyperactivated stallion spermatozoa fail to exhibit a rheotaxis-like behaviour,  
unlike other species**

Jon Romero-Aguirregomezcorta, Emer Sugrue, Lucía Martínez-Fresneda, David  
Newport and Sean Fair\*

**Supplementary Information**

**Supplementary Video S1. Non-hyperactivated frozen-thawed stallion sperm in  
a microfluidic channel exhibiting rheotaxis.** Sperm detect the flow and swim  
against it during rheotaxis. The arrow indicates the direction of the flow.

**Supplementary Video S2. Non-hyperactivated frozen-thawed stallion sperm in  
a static environment.** This video was recorded as a control in order to compare the  
movement pattern of hyperactivated and non-hyperactivated sperm.

**Supplementary Video S3. Hyperactivated frozen-thawed stallion sperm in a  
static environment.** After incubation with procaine 5 mM sperm showed high-  
amplitude flagellar waves and asymmetrical flagellar beating when assessed in a  
static droplet.

**Supplementary Video S4. Non-hyperactivated fresh stallion sperm in a static  
environment.** This video was recorded as a control in order to compare the  
movement pattern of hyperactivated and non-hyperactivated sperm.

**Supplementary Video S5. Hyperactivated fresh stallion sperm in a static environment.** After incubation with procaine 5 mM sperm showed high-amplitude flagellar waves and asymmetrical flagellar beating when assessed in a static droplet.

**Supplementary Video S6. Hyperactivated frozen-thawed stallion sperm in a microfluidic channel.** Stallion sperm incubated with procaine (5 mM) were non-progressive and unable to exhibit rheotaxis. The arrow indicates the direction of the flow.

**Supplementary Video S7. Non-hyperactivated fresh stallion sperm in a microfluidic channel exhibiting rheotaxis.** Sperm detect the flow and swim against it during rheotaxis. The arrow indicates the direction of the flow.

**Supplementary Video S8. Hyperactivated fresh stallion sperm in a microfluidic channel.** Stallion sperm incubated with procaine (5 mM) were non-progressive and unable to exhibit rheotaxis. The arrow indicates the direction of the flow.

**Supplementary Figure S9. The percentage of hyperactivated sperm compared to the control treatment following incubation with the hyperactivation agonists, procaine (stallion), progesterone (human) and caffeine (ram) as characterised by high-amplitude flagellar waves and asymmetrical flagellar beating and assessed subjectively in a static saline droplet (Experiment 4). Vertical bars represent the s.e.m. (n=3 replicates). <sup>ab</sup>Differing superscripts differ significantly within species (P<0.05).**

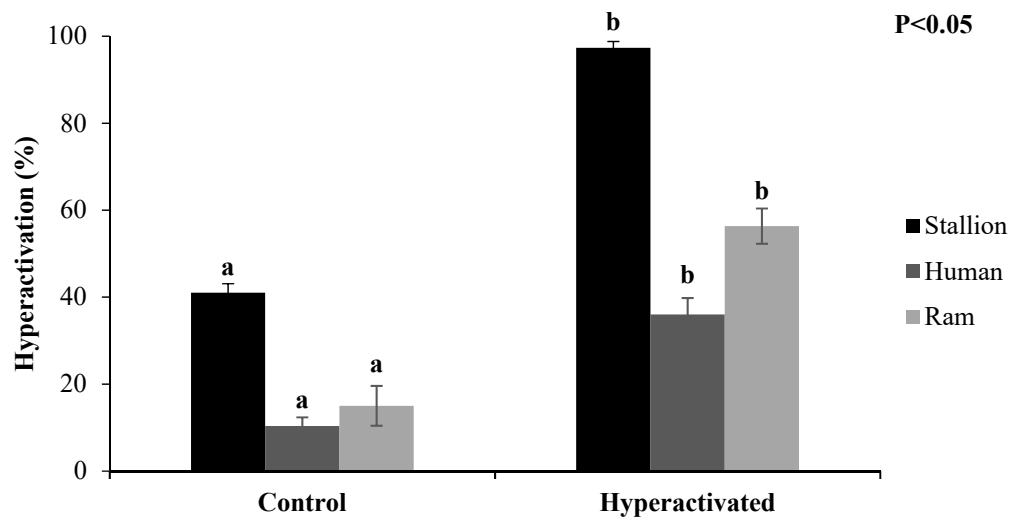

Supplement: Supplementary file 1 — Supplementary Information [file 41598_2018_34973_MOESM1_ESM.pdf]
